# Supplementary figures and images for: The formation mechanism of a Er3+-doped heterojunction ms/tz-BiVO4 with enhanced photocatalytic performance under visible light
Source: Royal Society of Chemistry journal article supplement (doi:10.1039/c6ra04543j), 2016-01-01

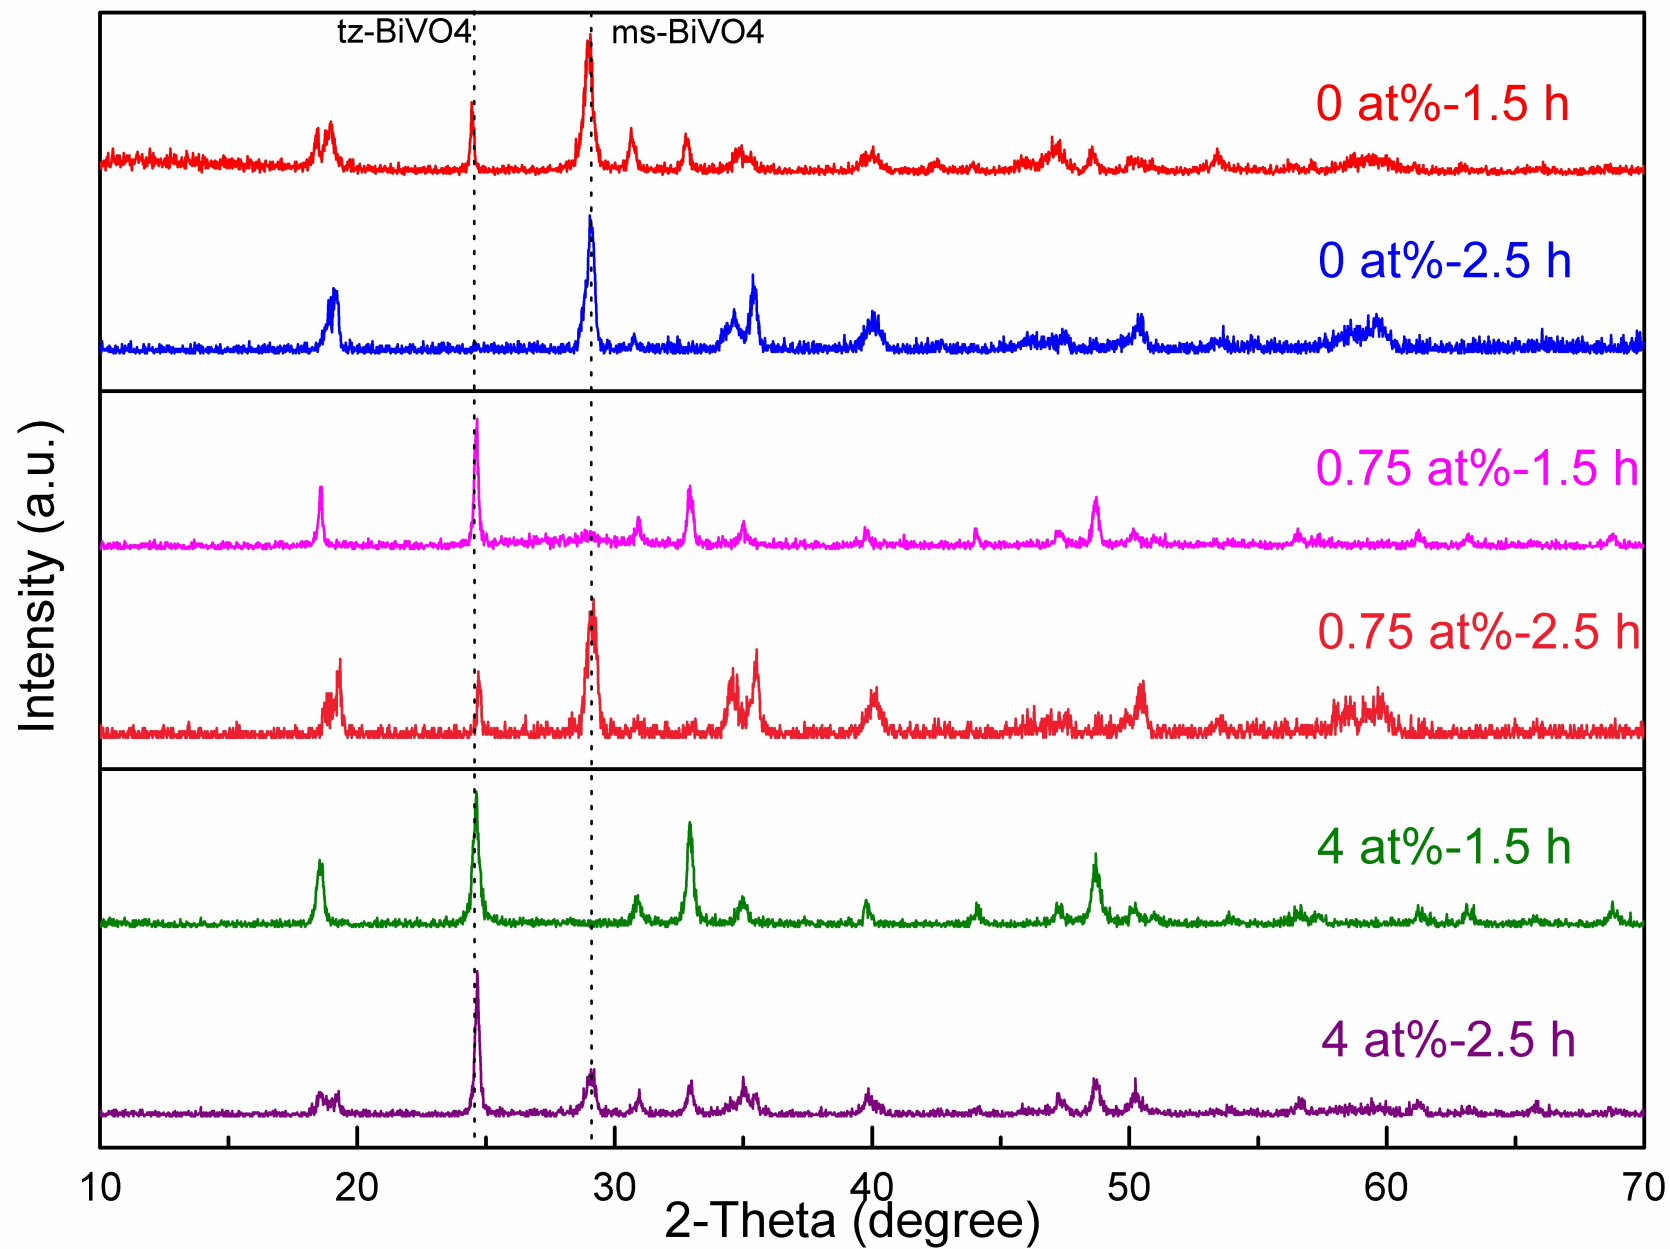

Supplement: c6ra04543j2.pdf [file c6ra04543j2.pdf]
